# Supplementary material
Source: PubMed Central journal article supplement (PMC3346121)
Supplement: supp_M111.314690_jbc.M111.314690-1.pdf [file supp_M111.314690_jbc.M111.314690-1.pdf]

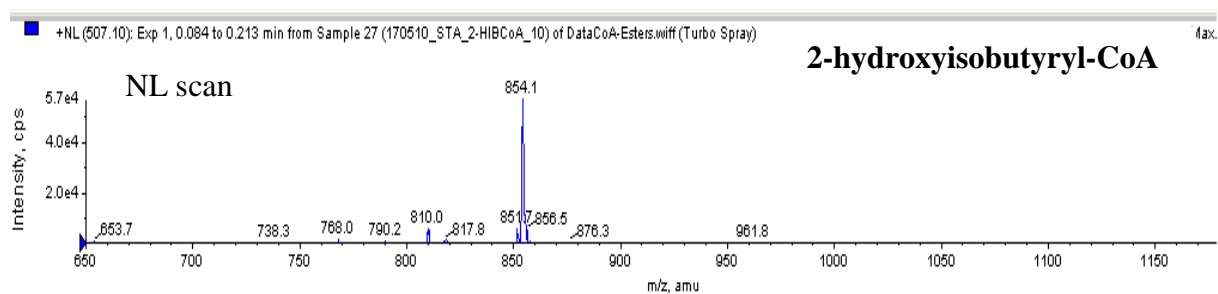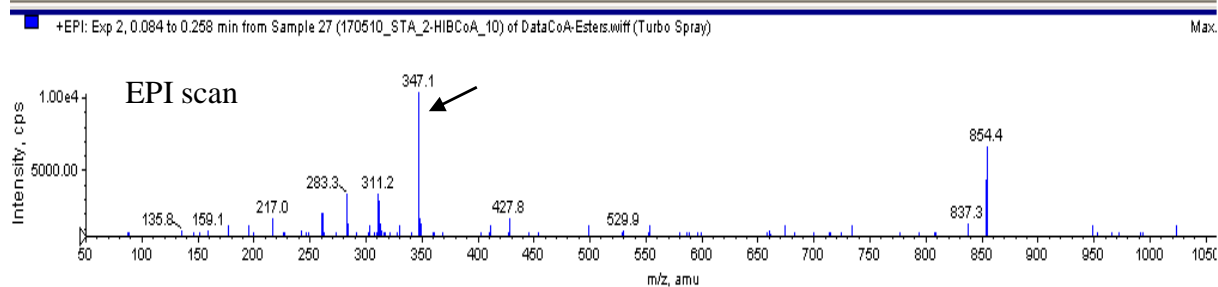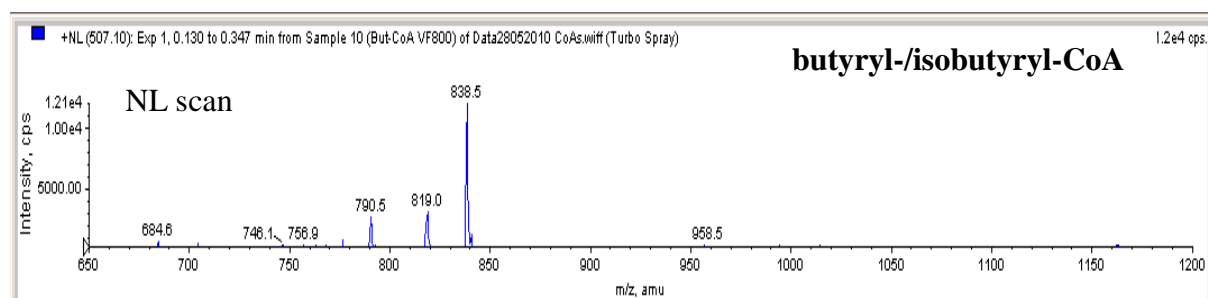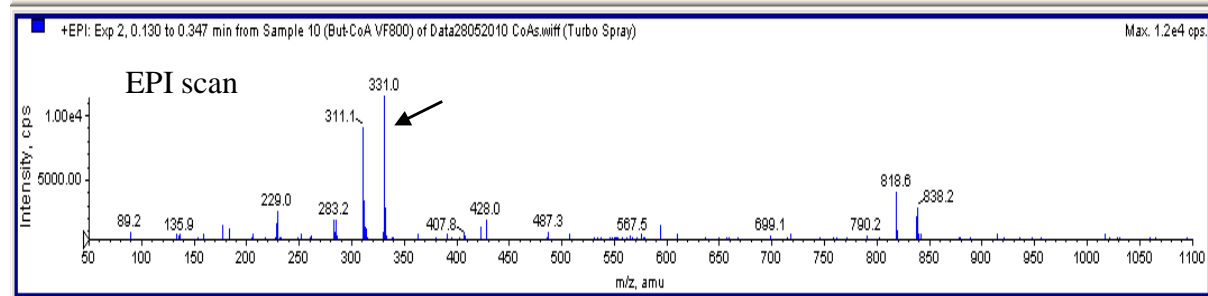

**Supplementary Fig. S1.** Analysis of synthesized acyl-CoA esters by ESI-MS/MS. In the Neutral Loss Scan mode (NL), masses of ionized acyl-CoA esters were detected, whereas in the Enhanced Product Ion Scan mode (EPI), also masses of smaller fragments were obtained. Characteristic fragments of 2-hydroxyisobutyryl-CoA ( $853.5 \text{ g mol}^{-1}$ ) and butyryl-/isobutyryl-CoA ( $837.5 \text{ g mol}^{-1}$ ) are the corresponding acyl-pantethein moieties of  $347.4$  and  $331.4 \text{ g mol}^{-1}$ , respectively, as indicated by arrows.

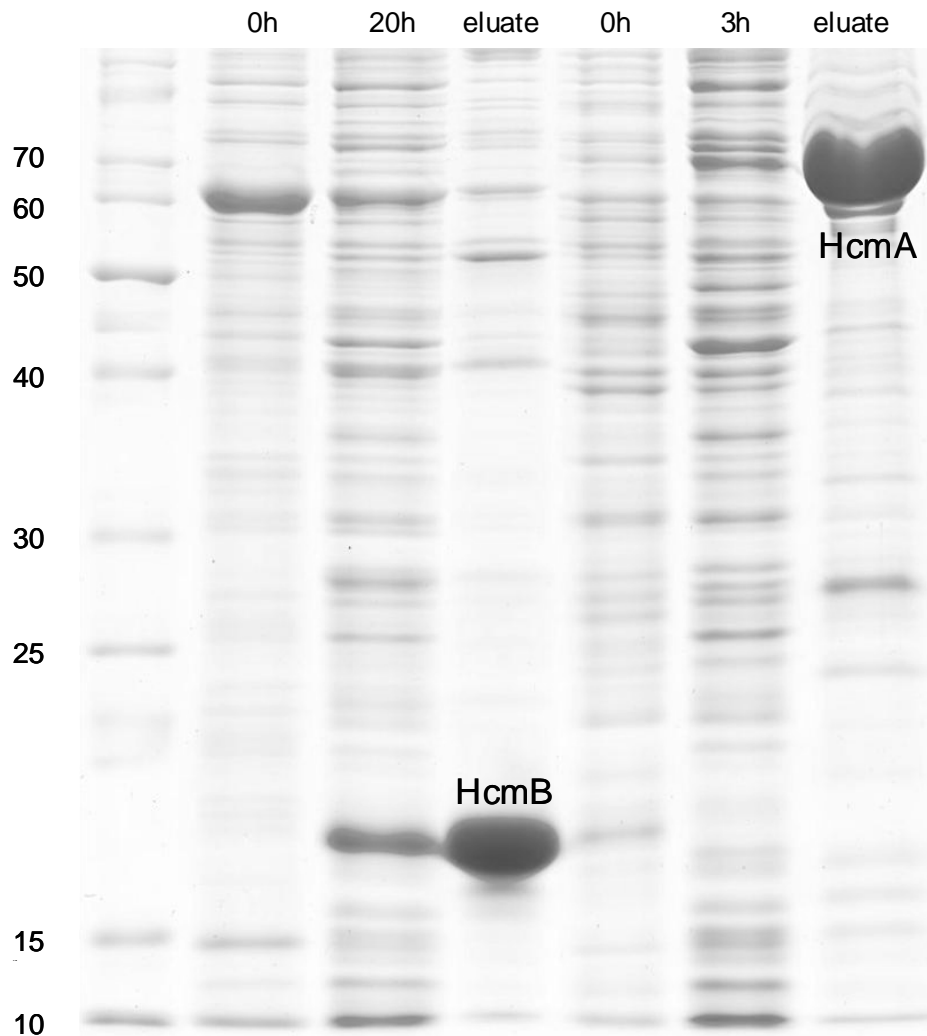

**Supplementary Fig. S2.** SDS PAGE analysis of crude extracts and eluates after heterologous expression of wild type HcmA and HcmB and their purification by one-step affinity chromatography, respectively (12% SDS-PAGE). Sampling times starting at induction of expression in *E. coli* strains TOP10 (HcmA) and ArcticExpress (DE3) (HcmB). Lanes: 0h, 30  $\mu$ g *E. coli* cell extract protein before induction; 20 and 3h, 30  $\mu$ g *E. coli* cell extract protein after 20 and 3 hours of induction, respectively; eluate, 30  $\mu$ g purified protein. The molecular masses (kDa) of standard proteins are indicated. SDS PAGE analysis of the expression and purification of the HcmA mutants I90Y, I90F and I90V gave similar results (not shown).

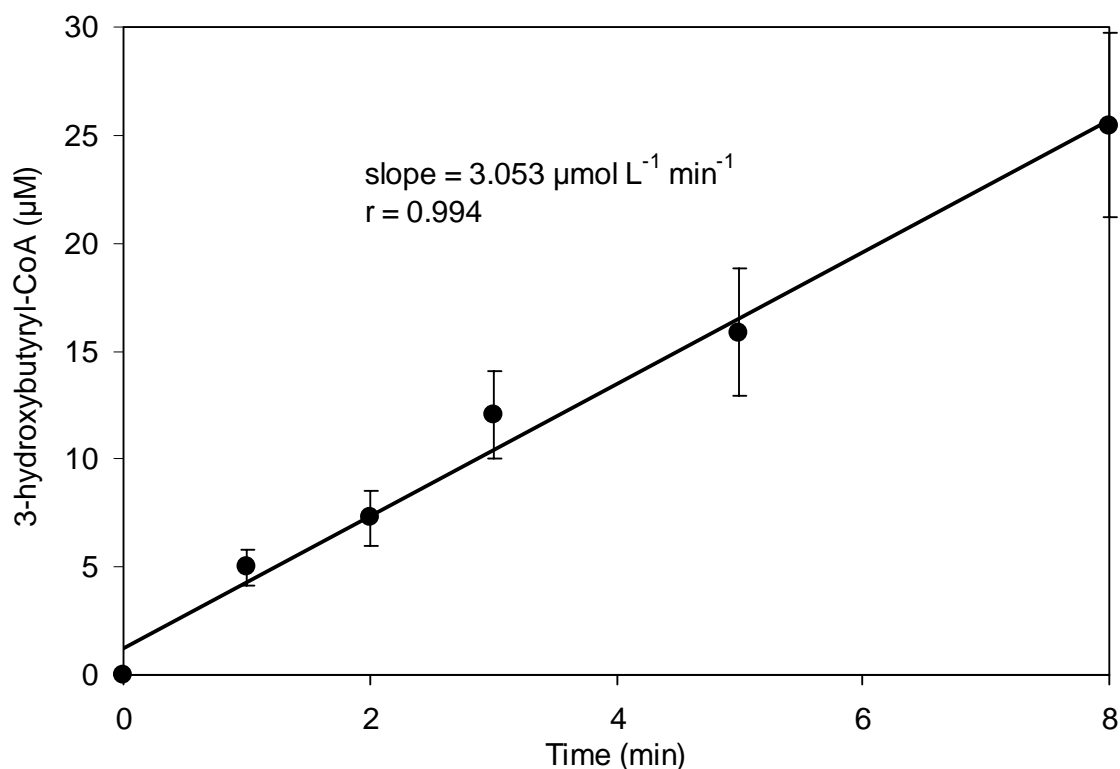

**Supplementary Fig. S3.** HPLC assay for quantifying HCM activity. Reconstituted wild type HcmAB (1.4  $\mu\text{M}$ ) was incubated with 250  $\mu\text{M}$  2-hydroxyisobutyryl-CoA at pH 6.6 and 30°C. The shown increase in 3-hydroxybutyryl-CoA represents mean values and SD of four replicates.

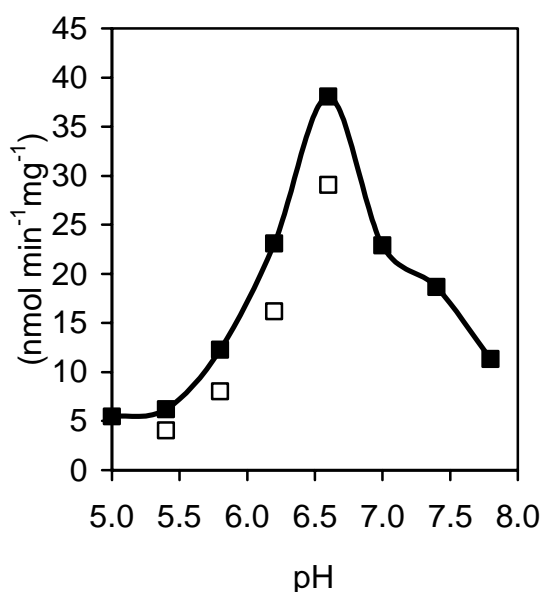

**Supplementary Fig. S4.** pH optimum of HCM activity (conversion of 2-hydroxyisobutyryl-CoA) obtained with reconstituted wild type HcmA and HcmB subunits incubated at 30°C in phosphate buffer (solid symbols) or phosphate/acetate buffer (open symbols).

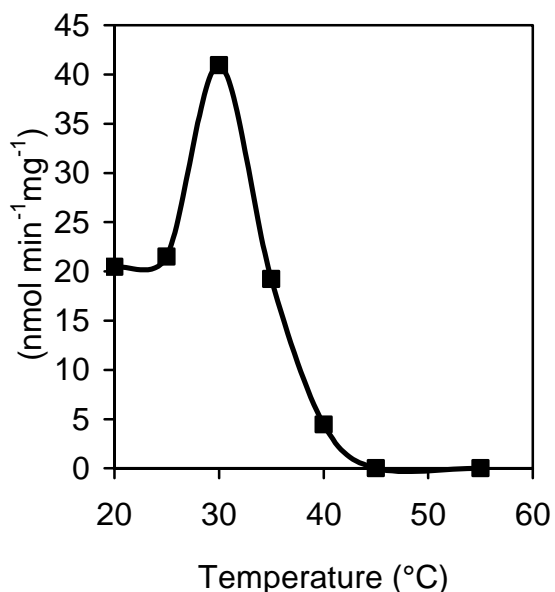

**Supplementary Fig. S5.** Temperature optimum of HCM activity (conversion of 2-hydroxyisobutyryl-CoA) obtained with reconstituted wild type HcmA and HcmB subunits incubated at pH 6.6.

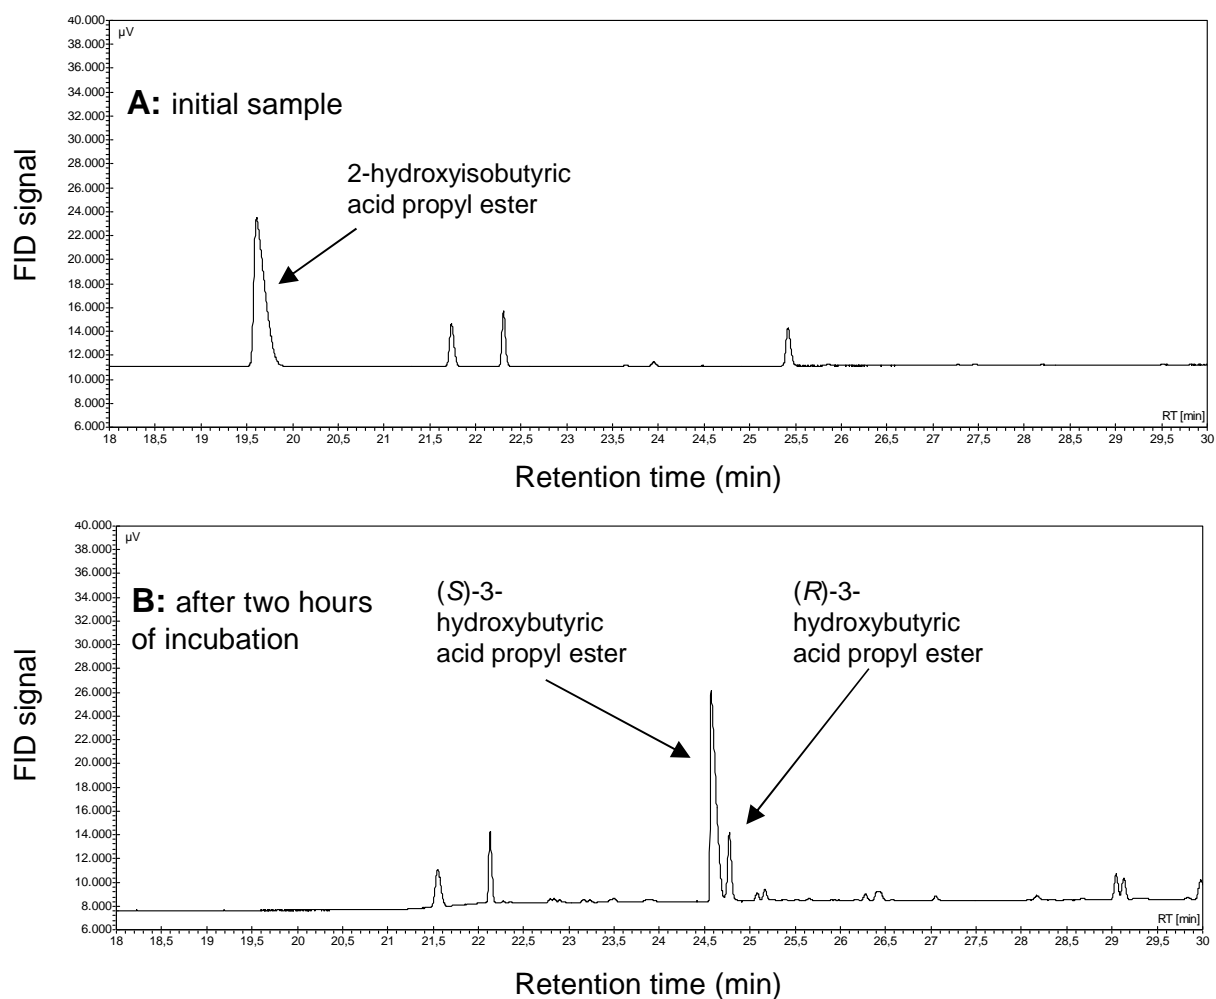

**Supplementary Fig. S6.** Analysis of stereospecificity of 2-hydroxyisobutyryl-CoA conversion to 3-hydroxybutyryl-CoA esters by reconstituted wild type HcmA and HcmB. The acyl-CoAs produced were determined as propyl esters by gas chromatography (GC) using a HP 6890 system from Agilent Technologies with a Chirasil-DEX CB column (25 m by 0.25 mm by 0.25  $\mu\text{m}$ ) and flame ionization detector (FID). The carrier gas was helium and the injector and detector temperature was 250°C. The following GC oven temperature program was applied. The initial temperature was 35°C increasing to finally 170°C at 3°C  $\text{min}^{-1}$  and holding this temperature for 5 min. Samples were dried under vacuum and then incubated with 1 mL propanolic HCl (3 M) at 110°C for 45 min. The propyl esters formed were dissolved in 150  $\mu\text{L}$  toluene prior to injection (1  $\mu\text{L}$ , split 1:100).

**A:** Initial assay sample, immediately after addition of 12 mM 2-hydroxyisobutyryl-CoA.

**B:** For generating a sufficient amount of 3-hydroxybutyryl-CoA esters, the enzyme was incubated two hours with 12 mM 2-hydroxyisobutyryl-CoA under optimal assay conditions.

HcmA\_L108 TYTAAD-IADTPLEDIG-----LPGRYPFTRGYPPTMYRSRTWTMRQIAGFG 94  
HcmA\_PM1 TYTAAD-IADTPLEDIG-----LPGRYPFTRGYPPTMYRSRTWTMRQIAGFG 94  
HcmA\_KD131 TYTAAD-IADTPLEDIG-----LPGKYPFTRGYPPTMYRGRNWTMRQIAGFG 95  
HcmA\_17029 TYTAAD-IADTPLEDIG-----LPGKYPFTRGYPPTMYRGRNWTMRQIAGFG 95  
HcmA\_Dsm506 TYTAAD-LADTPVEDIG-----LPGRYPFTRGYPPTMYRSRTWTMRQIAGFG 100  
HcmA\_Py2 VYTAAD-AAATPIEDIG-----LPGRYPFTRGYPPTMYRSRNWTMRQIAGFG 94  
HcmA\_CCNWXJ12-2 TYIAAD-IAGTPAEDIG-----LPGRYPFTRGYPPTMYRGRNWTMRQIAGFG 95  
HcmA\_DG893 TYTPLD-VKNTPFEDIG-----FPGQYPFTRGYPPTMYRGRNWTMRQIAGFG 97  
HcmA\_JS614 VYTPAD-LPED-WNDIG-----LPGQFPFTRGYPPTMYRGRHWMTMRQIAGFG 101  
IcmF\_HTA426 TLSGLD-IPKVVLPKFKDYGEILRWVYKENVPGSFPYTAGVFPFKRQG-EDPKRQFAGEG 593  
Icm\_A3823.5 VYGPRPGDTYDGFERIG-----WPGEYPFTRGLYATGYRRTWTIROFAGFG 84  
ECM\_17029 -----MTQKDS-----PWLFRITVAGHS 17  
MCM\_CIRM-BIA1 -LFNEDVYKDMDWLDTY-----AGIPPFVHGPYATMYAFRPWTIROVAGFS 93

\* \*\*

HcmA\_L108 TGEDTNKRFKYLIAQQQTG-ISTDFDMPTLMGYSDH-PMSDGEVGRGVAIDTLADMEA 152  
HcmA\_PM1 TGEDTNKRFKYLIAQQQTG-ISTDFDMPTLMGYSDH-PMSDGEVGRGVAIDTLADMEA 152  
HcmA\_KD131 TGEDTNKRFKFLIEQQQTG-ISTDFDMPTLMGYSDH-PMSDGEVGRGVAIDTLADMEA 153  
HcmA\_17029 TGEDTNKRFKFLIEQQQTG-ISTDFDMPTLMGYSDH-PMSDGEVGRGVAIDTLADMEA 153  
HcmA\_Dsm506 TGEDTNKRFKYLIAQQQTG-ISTDFDMPTLMGYSDH-PMSDGEVGRGVAIDTLADMEA 158  
HcmA\_Py2 TGEDTNKRFKYLIEQQQTG-ISTDFDMPTLMGYSDH-PMSDGEVGRGVAIDTLADMEA 152  
HcmA\_CCNWXJ12-2 TGEDTNRRFKFLIEQQQTG-ISTDFDMPTLMGYSDH-PMSDGEVGRGVAIDTLADMEA 153  
HcmA\_DG893 TARETNKRFKYLIAQQQTG-LSIDFDMPTLMGYSDH-AMSDGEVGRGVAIDTLADMEA 155  
HcmA\_JS614 QAEETNKRFQYLINQQQTG-LSDVDFMPTLMGLSDH-PMSLGEVGRGVAIDVLDLADMEA 159  
IcmF\_HTA426 TPERTNRRFHYLCKEDKAKRLSTAFDSVTLYGEDPDYRPIFGKVGSGVSVITLDDMKK 653  
Icm\_A3823.5 NAEQTNERFKMILANGGGG-LSVAFDMPTLMGRSDH-PRSLGEVGHCGVAIDSAADMEV 142  
ECM\_17029 TAKASNALYRTNLAKGQTG-LSVAFDLPTQTGYSDH-ALARGEVGVGVPICHLGDMMR 75  
MCM\_CIRM-BIA1 TAKESNAFYRRNLAAQKQK-LSVAFDLPTHRGYSDH-PRVAGDVGMAVADSIYDMRE 151

. : \* : : . : \* \* \* \* \* \* \* . . \* . \* \* \* : \* .

HcmA\_L108 LLADIDLEK--ISVSFTINPSAWILLAMYVALGEK-----RGY 188  
HcmA\_PM1 LLADIDLEK--ISVSFTINPSAWILLAMYVALGEK-----RGY 188  
HcmA\_KD131 LLDGIDLEK--ISVSLTINPTAWILLAMYIALCEE-----RGY 189  
HcmA\_17029 LLDGIDLEK--ISVSLTINPTAWILLAMYIALCEE-----RGY 189  
HcmA\_Dsm506 LFDGIDLEK--ISVSMTINPSAWILLAMYIVLAEK-----RGY 194  
HcmA\_Py2 LFDGIDLEK--ISVSMTINPSAWILLAMYIVLAEK-----RGY 188  
HcmA\_CCNWXJ12-2 LLADIDLEK--ISVSLTINPTAWILLAMYVALAEK-----RGY 189  
HcmA\_DG893 LFDGIDLEK--ISVSMTINPSAWILLAMYIALAEK-----RGY 191  
HcmA\_JS614 LFDGIDLEK--ISVSMTINPSAWILLAMYIAVAED-----KGY 195  
IcmF\_HTA426 LYKGFDLCDPLTISVSMTINGPAPILLAMFMNTAIDQVEKKEAELGRPLTPEEYEQVKEW 713  
Icm\_A3823.5 LFKDIPLDG--VTSMTISGPAVPVFCMYLVAER-----QGV 178  
ECM\_17029 LFDQIPLEQ--MNTSMTINATAPWLLALYIAVAEE-----QGA 111  
MCM\_CIRM-BIA1 LFDGIDLEK--MSVSMTMNGAVLPIALYVVTAE-----QGV 187

\* : \* : . \* : \* : . . : : : :

HcmA\_L108 DLNKLSGTVQADILKEYMAQKEYIYPIAPSVRIVRDIITYSAKNLKR-YNPINISGYHIS 247  
HcmA\_PM1 DLNKLSGTVQADILKEYMAQKEYIYPIAPSVRIVRDIITYSAKNLKR-YNPINISGYHIS 247  
HcmA\_KD131 DLNKVSGTVQADILKEYMAQKEYIFPIAPSVRIVRDIISHSRTMKR-YNPINISGYHIS 248  
HcmA\_17029 DLNKVSGTVQADILKEYMAQKEYIFPIAPSVRIVRDIISHSRTMKR-YNPINISGYHIS 248  
HcmA\_Dsm506 DLNKLSGTVQADILKEYMAQKEYVFPPIEPSVRIVRDCITYCARNMKR-YNPINISGYHIS 253  
HcmA\_Py2 DLNKLSGTVQADILKEYMAQKEYIYPIAPSVRIVRDCITYCAKMKR-YNPINISGYHIS 247  
HcmA\_CCNWXJ12-2 DLNKLSGTVQADILKEYMAQKEYIFPIAPSVRIVRDLIAYSTRMKR-YNPINISGYHIS 248  
HcmA\_DG893 DLNKLSGTVQADILKEYMAQKEYIFPVRPSVRLVRDCIQYGSNMNR-YNPINISGYHIS 250  
HcmA\_JS614 DLNKLSGTVQADILKEYMAQKEYIFPVRPSMRIVRDCIAYCAENMAR-YNPINISGYHIS 254  
IcmF\_HTA426 TLQTVRGTQADILKEDQGNQTCIFSTDFALKMMGDIQYEIFKHRVRYNYSVVISGYHIA 773  
Icm\_A3823.5 DPAVLNGTLQTDIFKEYIAQKEWLFQPEPHRLIGDLMEHCARDIPA-YKPLSVSGYHIR 237  
ECM\_17029 DISKLGTVQADNDLMKEYLSRGTYICPPRPSLRMITDVAAYTRVHLPK-WNPMNVCSYHLQ 170  
MCM\_CIRM-BIA1 KPEQLAGTVQADNDILKEFMVRYNTYIYPPQPSMRIISEIFAYTSANMPK-WNSISISGYHMQ 246

: \* : \* \* : \* : \* : : : : : : : : : : \* : \*

HcmA\_L108 EAGSSPLQEAFTLANLIYVNEV--TKTGMHVDEFAPRLAFFFVVSQGDFFEEVAKFRAL 305  
HcmA\_PM1 EAGSSPLQEAFTLANLIYVNEV--TETGMHVDEFAPRLAFFFVVSQGDFFEEVAKFRAL 305  
HcmA\_KD131 EAGSSPLHEAFTLANLIYVVEEV--LKTGVEVDDFAPRLAFFFVVSQADFFEEIAKFRAL 306  
HcmA\_17029 EAGSSPLHEAFTLANLIYVVEEV--LKTGVEVDDFAPRLAFFFVVSQADFFEEIAKFRAL 306  
HcmA\_Dsm506 EAGSSPLHEAFTLANLIYVVEEV--LKTGMQVDEFAPRLAFFFVVSQADFFEEIAKFRAL 311  
HcmA\_Py2 EAGSSPVDEVAFTLANLIYVVEEV--LKTGMKVDDFAPRLAFFFVVSQADFFEEIAKFRAL 305  
HcmA\_CCNWXJ12-2 EAGSSPLHEAFTLANLIYVVEEV--TKLGDVDDFAPRLAFFFVVSQADFFEEVAKFRAL 306  
HcmA\_DG893 EAGSTAVQEVAYTMAITMAYVVRTA--IDAGVDVNDVDFGRLSFFVVSQADFFEEIAKFRAL 308  
HcmA\_JS614 EAGANAVQEVAFMAITRAYVSDV--IAAGVDVDTFAPRLSFFVVSQADFFEEIAKFRAL 312  
IcmF\_HTA426 EAGANPIQLAFATLANLGYVVEEV--LSRGMHIDDFAPRLSFFVVSQADFFEEIAKFRAL 830  
Icm\_A3823.5 EAGATAAQELAYTLADGFGYVELG--LSRGLDLDVDFAPRLSFFVVSQADFFEEIAKFRAL 295  
ECM\_17029 EAGATPEQELAFALATGIAVLDDLRTRKVPVPAEHFPAHVGRISFFVVSQADFFEEIAKFRAL 230  
MCM\_CIRM-BIA1 EAGATADIE MAYTLADGVDYIRAG--ESVGLNVDVDFAPRLSFFVVSQADFFEEIAKFRAL 304

\*\*\* : . : \* : \* : \* : : : : : : : : : : \* .

```

HcmA_L108      RRCYAKIMKERFGARNPESMRLRFHCQTAAATLTKPQYMNVVVRTSLQALSAVLG---GA 362
HcmA_PM1      RRCYAKIMKERFGAKNPESMRLRFHCQTAAATLTKPQYMNVVVRTSLQALSAVLG---GA 362
HcmA_KD131    RRCYAKIMKERFGAKKESMRLRFHCQTAAASLTKPQYMNVMRTTQALAAAVLG---GA 363
HcmA_17029    RRCYAKIMKERFGAKKESMRLRFHCQTAAASLTKPQYMNVMRTTQALAAAVLG---GA 363
HcmA_Dsm506   RRCYAKIMKERFGAQNPESMRLRFHCQTAAASLTKPQYMNVVVRTAMQALAAALG---GT 368
HcmA_Py2      RRCYAKIMKERFGARNPESMRLRFHCQTAAASLTKPQFMNVVVRTTLQALAAAVLG---GC 362
HcmA_CCNWXJ12-2 RRCYAKIMKERFGARQPESMRLRFHCQTAAASLTKPQYMNVVVRTAMQALSAVLG---GT 363
HcmA_DG893    RRVYAKIMREKFGATKPEASRLRFHAQTAAATLTKPQYTNINPIRTALQALSAVLG---GA 365
HcmA_JS614    RRFYAKMMRDEFGAENQSMRLRFHAQTAAATLTKPQPMNNIIRTTLQALSAILG---GA 369
IcmF_HTA426   RRIWAIVMREKYGANE-RSQKLYHIQTSGRSLHAQEIDFNDIRTTLQALLAIYD---NC 886
Icm_A3823.5   RRIWARWLRDEYGAKTEKAQWLRFHTQTAGVSLTAQQPYNNVVRTAVEALAAAVLG---GT 352
ECM_17029     VDLWDEICRDYGIEEEKYRRFRYGVQVNSLGLTEQQPENNVYRILIEMLAVTLSKKARA 290
MCM_CIRM-BIA1 RMLWAKLVHQ-FGPKNPKSMSLRTHSQTSGSWLSLTAQDVYNNVVRTCIEAMAATQG---HT 360
:      : : *      .      : : * . *      :      * *      : : . .

HcmA_L108      QSLHTNGYDEAFAIPTEDAMKMALRTQQIIAEESGVADVIDPLGSSYVVEALTTEYEKKI 422
HcmA_PM1      QSLHTNGYDEAFAIPTEDAMKMALRTQQIIAEESGVADVIDPLGSSYVVEALTTEYEKKI 422
HcmA_KD131    QSLHTNGYDEAFAIPTEHAMQLALRTQQVIADETGVTQVVDPLGSSYFVESLTNDYEKKI 423
HcmA_17029    QSLHTNGYDEAFAIPTEHAMQLALRTQQVIADETGVTQVVDPLGSSYFVESLTNDYEKKI 423
HcmA_Dsm506   QSLHTNGYDEAFAIPTEDAMRMALRTQQVIAEETNVTQVVDPLGSSYVVESLTTEYEKRI 428
HcmA_Py2      QSLHTNGFDEAFAIPTEEAMRLALRTQQVIAEESNVTQVIDPVGSSYVVETLTTEYEKRI 422
HcmA_CCNWXJ12-2 QSLHTNGFDEAFAIPTEEAMQLALRTQQVIADETNVTQVVDPLGSSYVVEALTNEYEKRI 423
HcmA_DG893    QSLHTNGMDEAFAIPTEEAMRIALRTQQIIAYETNITQVVDPLGSSYVVENLTDEIEKEV 425
HcmA_JS614    QSLHTNGLDEAYTIPSETAMKIALRTQQVIAHETGVPSIVDPLGSSYVVEALTDEIETGI 429
IcmF_HTA426   NSLHTNAYDEAITPTEESVRRAMAIQLIITKEFGLTKNENPLGSFIIEELTDLVEEAV 946
Icm_A3823.5   NSLHTNALDETLALPSEQAEIALRTQQVLMEETGVANVADPLGSWYIEQLTDRIEADA 412
ECM_17029     RAVQLPAWNEALGLPRPWDQQWSLRMQQILAYESDLLEYEDLFDGNPAIERKVEALKDGA 350
MCM_CIRM-BIA1 QSLHTNSLDEAIALPTDFSARIARNTQLFLQQESGTTRVIDPWSGSAYVEELTWDLARKA 420
: : : . : * : . : * : * . : * . : *

```

**Supplementary Fig. S7.** Extended ClustalW2 multiple sequence alignment of substrate binding domains of B<sub>12</sub>-dependent acyl-CoA mutases shown in Fig. 7. Comparison of HcmA from *A. tertiaricarbonis* L108 to orthologous sequences from *M. petroleiphilum* PM1 (Mpe\_B0541), *R. sphaeroides* KD131 (RSKD131\_3116), *R. sphaeroides* ATCC 17029 (Rsph17029\_3657), *S. novella* DSM 506 (Snov\_2770), *X. autotrophicus* Py2 (Xaut\_5021), *M. alhagi* CCNWXJ12-2 (ZP\_09295256), *M. algicola* DG893 (MDG893\_09606) and *Nocardioides* sp. JS614 (Noca\_2131). In addition, the paralogous domains of ICM from *S. cinnamomensis* A3823.5 (*icm*, AAC08713), IcmF from *G. kaustophilus* HTA426 (GK3391), MCM from *P. freudenreichii* subsp. *shermanii* CIRM-BIA1 (YP\_003687736) and ECM from *R. sphaeroides* ATCC 17029 (Rsph17029\_2621) were aligned. Bold amino acids show conserved residues directly involved in substrate binding. Residues highlighted on gray background are known to interact specifically with the CoA moiety. White-typed amino acids on black highlight the residues thus far identified to interact specifically with the acyl group of the substrates. Asterisks indicate identical residues in all sequences, ":" mark conserved substitutions and "." assign semi-conserved substitutions with similar shapes.
